# Supplementary material for: ChLae1 and ChVel1 Regulate T-toxin Production, Virulence, Oxidative Stress Response, and Development of the Maize Pathogen Cochliobolus heterostrophus
Source: PubMed Central journal article supplement (PMC3285592; doi:10.1371/journal.ppat.1002542), 2012-02-23
Supplement: ppat.1002542.s001.pdf [file ppat.1002542.s001.pdf]

**A**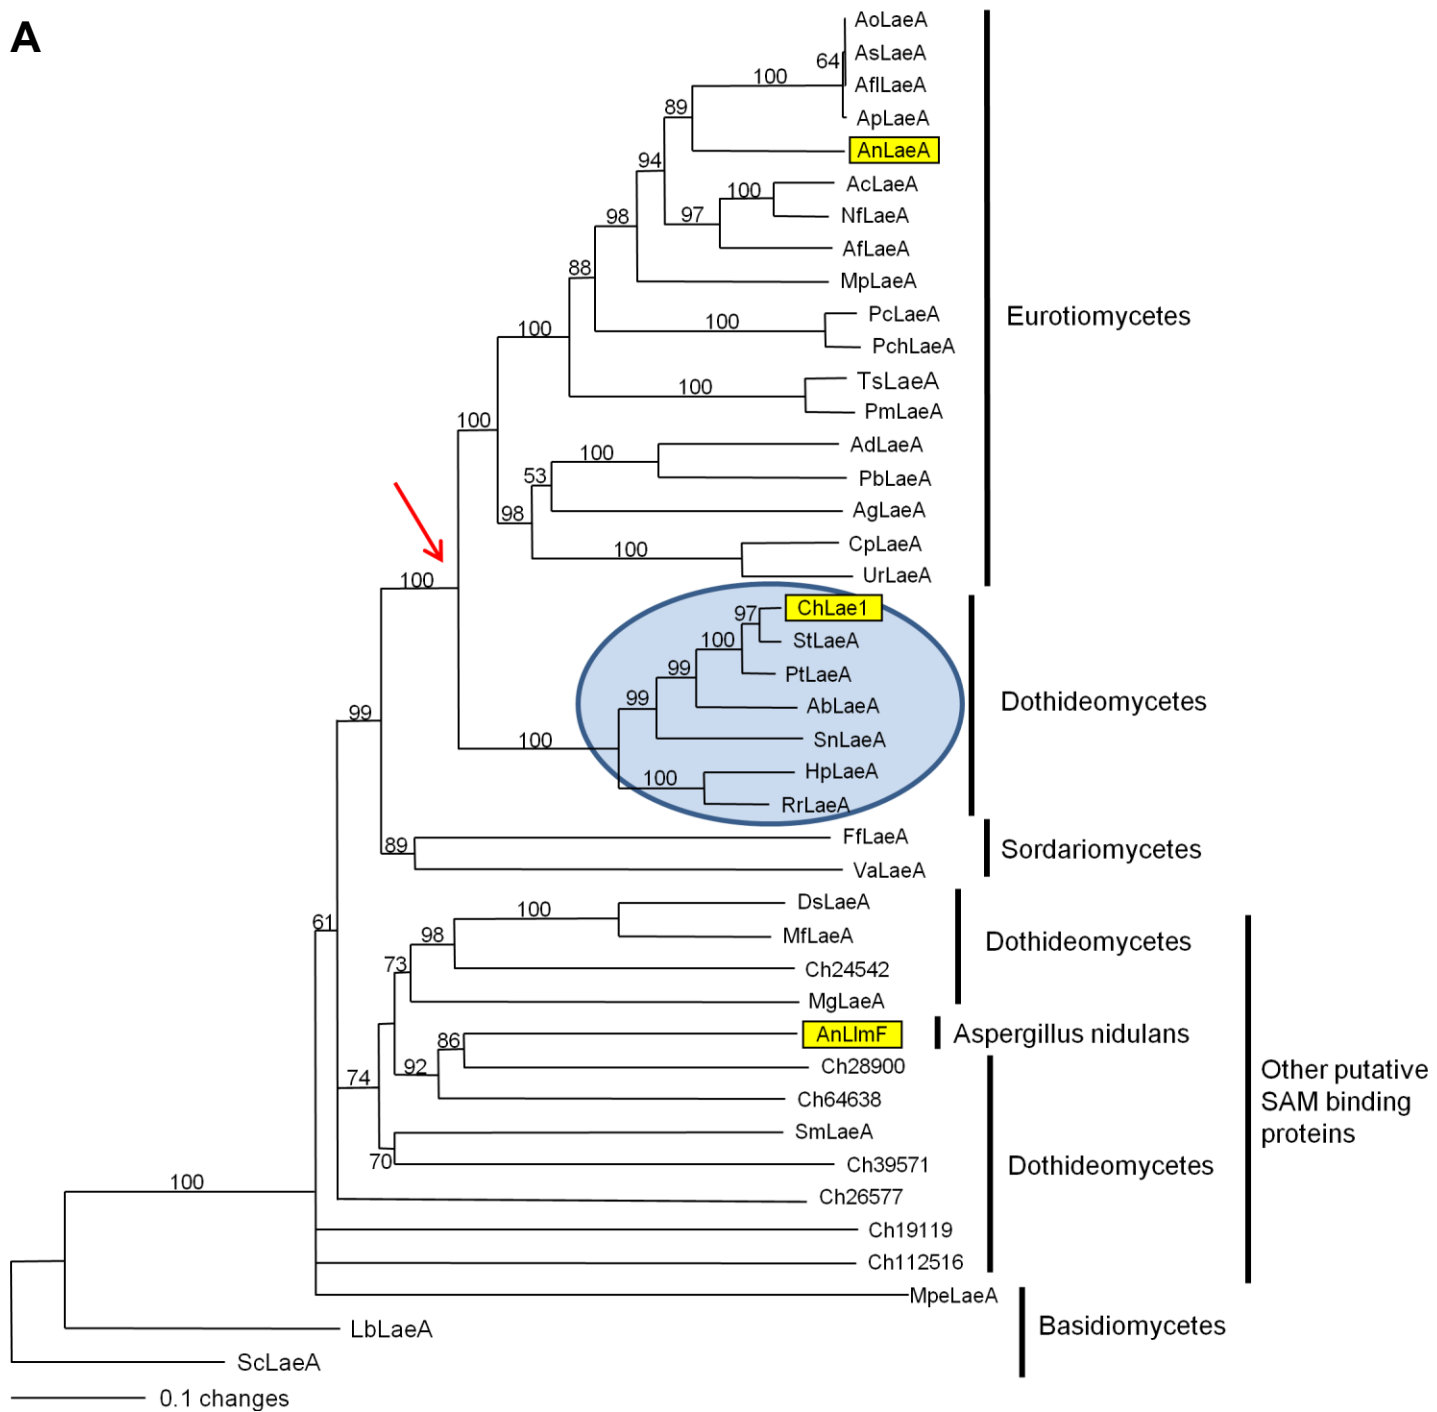

## B

AfLaeA -----MLWTSIQSQTGVPLQR----ETRPLVVGTPMVPQVLIL 34  
AnLaeA MFEMGPVGTRLPAMTSPAHNHYSYHSPTSDDRGRSRQNSDAMDIQSITEREPATRYAVAG 60  
ChLae1 -----

AfLaeA PVASISLFPSSLLFSYSCSPFFRAAVKAENGRTYHGYRKG IYMLPCDEQE QDRLDIFHKL 94  
AnLaeA GPAPWNRNGSPSPMYSNNSERNQFHEENGRTYHGFRRGMYFLPCDEQE QDRLDIFHKL 120  
ChLae1 -----MENGRWYHGFRRGLYMYPCDEPEKDRMDIYHQF 33  
\*\*\*\* \*\*\*:\*\*\*:\*\*\*\* \*\*\*:\*\*\*:\*\*\*:\*\*\*\*

AfLaeA FTVARVSDGLIYAPHPTN----GRFLD LGCCTGIWAIDVANKYPEAFVVGVDLAPIQPPN 150  
AnLaeA FTVARVSESLIYAPHPTN----GRFLD LGCCTGIWAIEVANKYPDAFVAGVDLAPIQPPN 176  
ChLae1 FAVARRGQ-LHQAPVPSEPHLQPRILD VGCCTGIWAIDMADKYLNAEVLGLDLVNIQPEK 92  
\*:\*\*\* .: \* \*\* \*:: \*\*\*:\*\*\*\*\*:\*\*\*: \*\* \* \* \*\*\*: \*\*\* :

AfLaeA HPRNCDFYAPFD FESLWALGEDSWDLIHLMGSGSVASWP NLYRRIYSHLRPG-AWFEQV 209  
AnLaeA HPKNCEFYAPFD FEAPWAMGEDSWDLIHLMGCGSVMGWP NLYRRIFAHLRPG-AWFEQV 235  
ChLae1 IPPNLRFRVPRDYESPWTLGEDSWDLIHLMACGSVESWPELYQKIYTHLKP GTGWIEHI 152  
\* \* \* . \* \*:: \*\*\*:\*\*\*\*\*:\*.\*\*\* \*\*\*:\*\*\*:\*\*\*:\*\*\* \*\*\*:\*\*\* .\*:\*\*\*:

AfLaeA EIDFEPRCDDRSLEG-LAIRQWYQLLKQATEETMRPVAHNSRETIRNLQEAGFTEIDHQM 268  
AnLaeA EIDFEPRCDDRSLDG-TALRHWDCLKQATAETMRPIAHSSRDTIKDLQDAGFTEIDHQI 294  
ChLae1 EIDMEPRCDDYTLPPDSMLRKWYGWLADATQRAYRPIAYEHR-TRQLLQAAGFIDIQETV 211  
\*\*\*:\*\*\*\*\* :\* :\*\*\* \* :\*\* .: \*\*\*: . \* \* : \*\* \*\*\* :\* . :

AfLaeA VGLPLNPWHEDEHERRVARWYNLAISESIETMSLAPFSRVFGWPIER- IKQIAADV KSEA 327  
AnLaeA VGLPLNPWHQDEHERKVARWYNLAVSESIENLSLAPFSRVYRWPLER- IQQLAADV KSEA 353  
ChLae1 IRVPYNTWPNDPHQKDIGRWYNLGLTEGLEALTFAPLTRVYHWDLNAHVRPIVEGVRREL 271  
: : \* \* . \* \*:: .:\*\*\*\*\*:\*\*\*:\*\*\*:\*\*\*: \* : : : . . \* : \*

AfLaeA FNKEIHTYNI LHIYQARKPLAN 349  
AnLaeA FNKEIHAYNI LHIYQARKPLR- 374  
ChLae1 CNRKIHAYNNI HIWTARRPQQ- 292  
\*:\*:\*\*\*:\*\*\* \*\*\*:\*\*\*
