# Supplementary material for: ChLae1 and ChVel1 Regulate T-toxin Production, Virulence, Oxidative Stress Response, and Development of the Maize Pathogen Cochliobolus heterostrophus
Source: PubMed Central journal article supplement (PMC3285592; doi:10.1371/journal.ppat.1002542), 2012-02-23

A

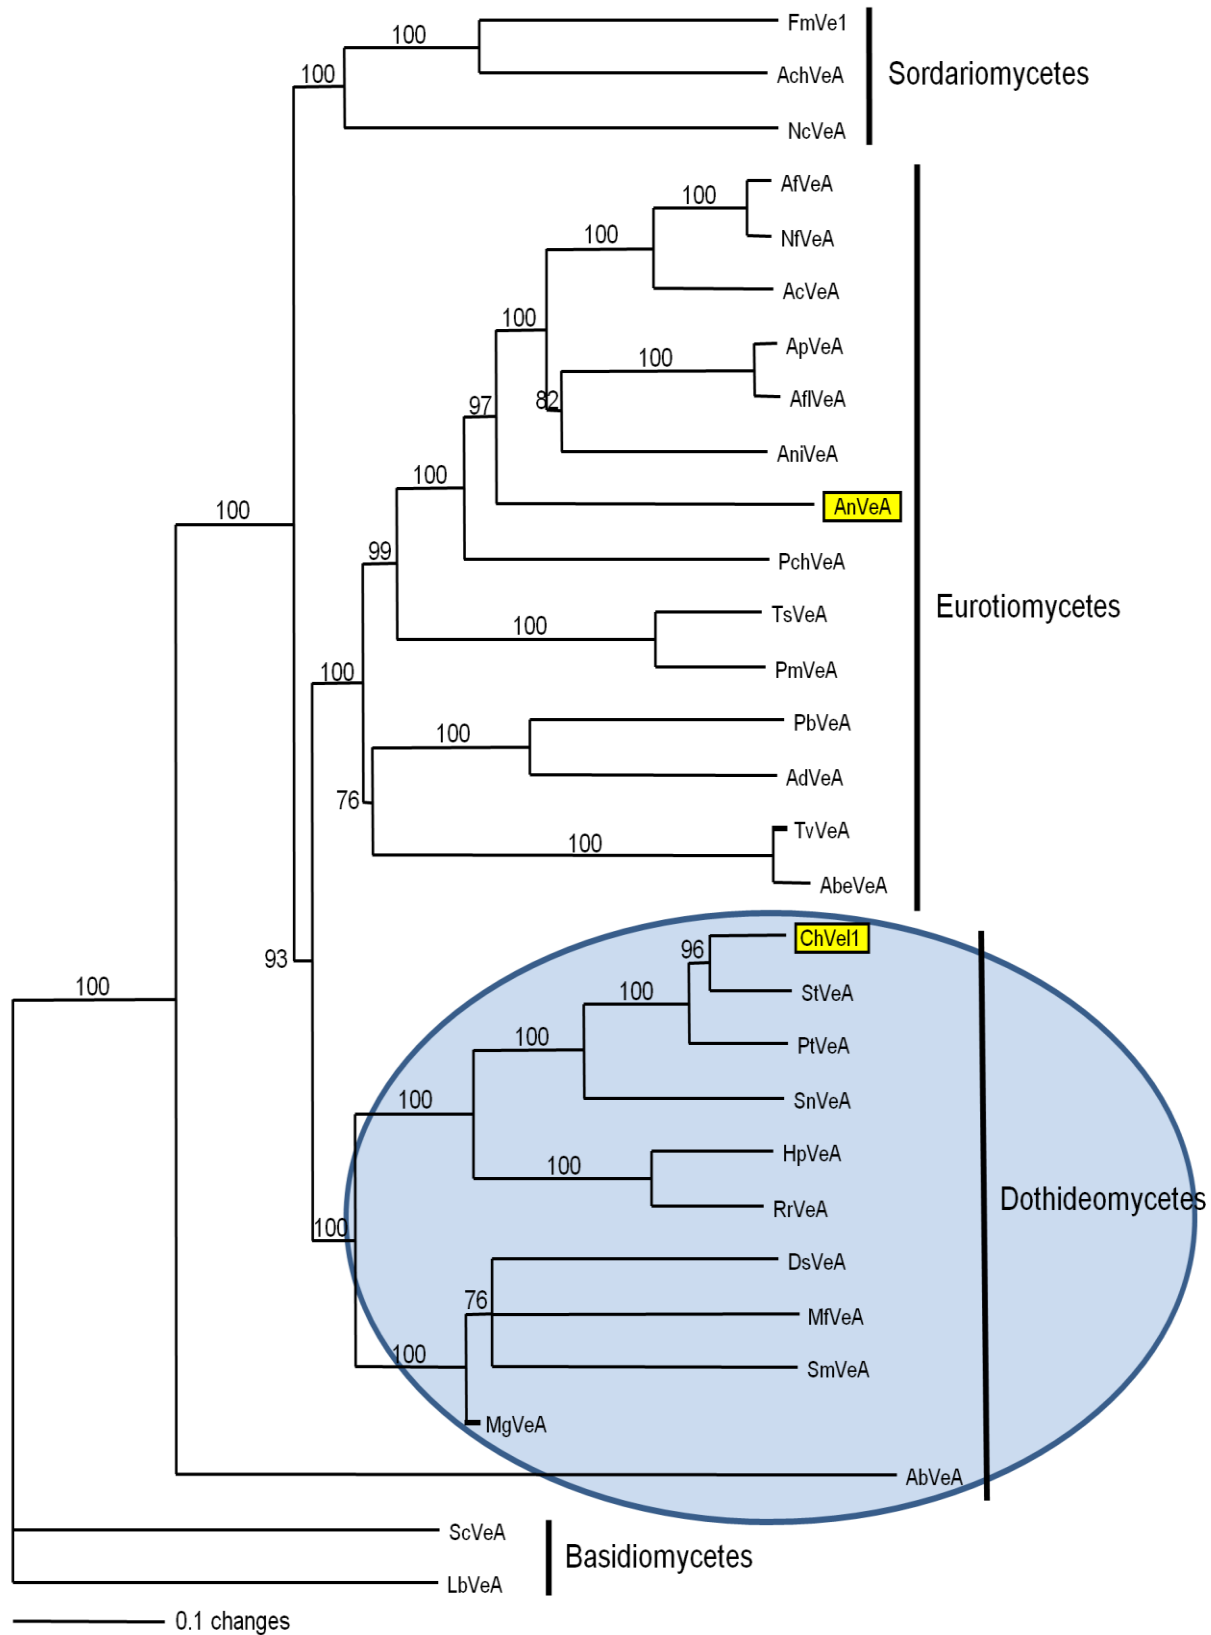

Supplement: ppat.1002542.s002.pdf [file ppat.1002542.s002.pdf]
